# Supplementary material
Source: Springer Nature journal article supplement (https://www.springermedizin.de/resource/supplementary/13075_2009_2700_MOESM2_ESM.pdf/9692678)

control

RA

A

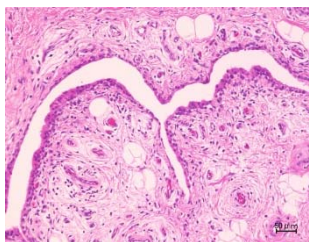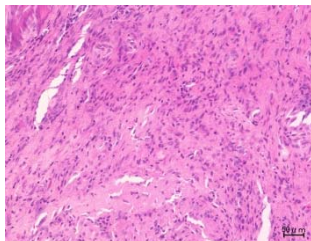

B

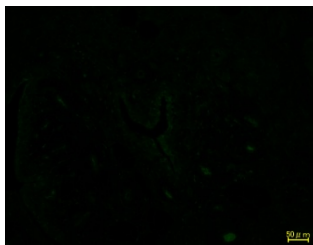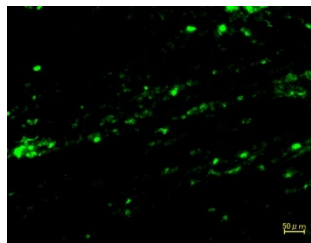

C

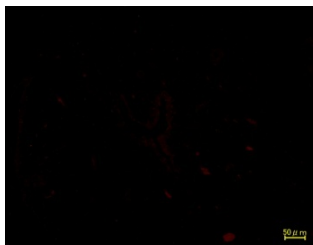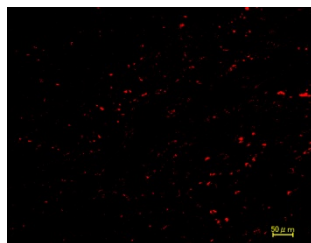

D

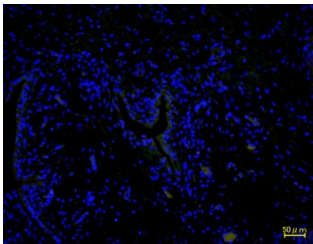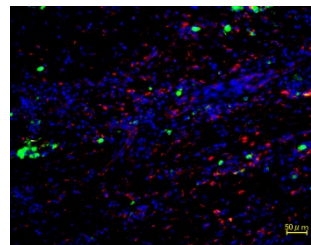

Supplement: MOESM2 [file 9692678]
